# Supplementary material
Source: bioRxiv or medRxiv preprint supplement (https://www.biorxiv.org/highwire/filestream/72700/field_highwire_adjunct_files/7/237255-6.pdf)
Supplement: Supplementary file [file 237255-6.pdf]

**Table S6. List of *V. nonalfalfae* CSEPs, including EffectorP prediction and similarity to effectors in the PHI database**

| Gene ID          | EffectorP | PHI-phenotype     | PHI-organism            | PHI-protein | PHI-coverage | PHI e-value |
|------------------|-----------|-------------------|-------------------------|-------------|--------------|-------------|
| <i>Vna1.53</i>   | -         | -                 | -                       | -           | -            | -           |
| <i>Vna1.63</i>   | -         | -                 | -                       | -           | -            | -           |
| <i>Vna1.67</i>   | -         | -                 | -                       | -           | -            | -           |
| <i>Vna1.122</i>  | -         | Reduced virulence | <i>Candida albicans</i> | DUR1,2      | 32.45        | 0.000000008 |
| <i>Vna1.124</i>  | -         | -                 | -                       | -           | -            | -           |
| <i>Vna1.139</i>  | -         | -                 | -                       | -           | -            | -           |
| <i>Vna1.150</i>  | -         | -                 | -                       | -           | -            | -           |
| <i>Vna1.190</i>  | -         | -                 | -                       | -           | -            | -           |
| <i>Vna1.282</i>  | -         | -                 | -                       | -           | -            | -           |
| <i>Vna1.285</i>  | -         | -                 | -                       | -           | -            | -           |
| <i>Vna1.306</i>  | 0.992     | -                 | -                       | -           | -            | -           |
| <i>Vna1.342</i>  | -         | -                 | -                       | -           | -            | -           |
| <i>Vna1.348</i>  | 1         | -                 | -                       | -           | -            | -           |
| <i>Vna1.431</i>  | -         | -                 | -                       | -           | -            | -           |
| <i>Vna1.504</i>  | -         | -                 | -                       | -           | -            | -           |
| <i>Vna1.527</i>  | -         | -                 | -                       | -           | -            | -           |
| <i>Vna1.542</i>  | -         | -                 | -                       | -           | -            | -           |
| <i>Vna1.565</i>  | 1         | -                 | -                       | -           | -            | -           |
| <i>Vna1.566</i>  | -         | -                 | -                       | -           | -            | -           |
| <i>Vna1.575</i>  | 0.705     | -                 | -                       | -           | -            | -           |
| <i>Vna1.584</i>  | -         | -                 | -                       | -           | -            | -           |
| <i>Vna1.837</i>  | -         | -                 | -                       | -           | -            | -           |
| <i>Vna1.913</i>  | -         | -                 | -                       | -           | -            | -           |
| <i>Vna1.970</i>  | 0.895     | -                 | -                       | -           | -            | -           |
| <i>Vna1.1072</i> | -         | -                 | -                       | -           | -            | -           |
| <i>Vna1.1084</i> | 0.722     | -                 | -                       | -           | -            | -           |
| <i>Vna1.1133</i> | -         | -                 | -                       | -           | -            | -           |
| <i>Vna1.1196</i> | 0.764     | -                 | -                       | -           | -            | -           |

|                  |       |                             |                                       |           |       |       |
|------------------|-------|-----------------------------|---------------------------------------|-----------|-------|-------|
| <i>Vna1.1229</i> | 0.947 | -                           | -                                     | -         | -     | -     |
| <i>Vna1.1231</i> | -     | -                           | -                                     | -         | -     | -     |
| <i>Vna1.1233</i> | -     | -                           | -                                     | -         | -     | -     |
| <i>Vna1.1245</i> | -     | -                           | -                                     | -         | -     | -     |
| <i>Vna1.1274</i> | 0.893 | Effector (plant avirulence) | <i>Magnaporthe oryzae</i> (related: / | MgSM1     | 72.46 | 4E-68 |
| <i>Vna1.1302</i> | 0.979 | -                           | -                                     | -         | -     | -     |
| <i>Vna1.1318</i> | -     | -                           | -                                     | -         | -     | -     |
| <i>Vna1.1334</i> | 1     | -                           | -                                     | -         | -     | -     |
| <i>Vna2.8</i>    | -     | Effector (plant avirulence) | <i>Magnaporthe oryzae</i>             | AVR-Pita1 | 31.98 | 3E-18 |
| <i>Vna2.47</i>   | -     | -                           | -                                     | -         | -     | -     |
| <i>Vna2.60</i>   | -     | -                           | -                                     | -         | -     | -     |
| <i>Vna2.73</i>   | -     | -                           | -                                     | -         | -     | -     |
| <i>Vna2.93</i>   | -     | -                           | -                                     | -         | -     | -     |
| <i>Vna2.98</i>   | -     | -                           | -                                     | -         | -     | -     |
| <i>Vna2.100</i>  | -     | -                           | -                                     | -         | -     | -     |
| <i>Vna2.118</i>  | -     | -                           | -                                     | -         | -     | -     |
| <i>Vna2.175</i>  | -     | -                           | -                                     | -         | -     | -     |
| <i>Vna2.179</i>  | -     | -                           | -                                     | -         | -     | -     |
| <i>Vna2.199</i>  | -     | -                           | -                                     | -         | -     | -     |
| <i>Vna2.227</i>  | -     | -                           | -                                     | -         | -     | -     |
| <i>Vna2.228</i>  | -     | -                           | -                                     | -         | -     | -     |
| <i>Vna2.250</i>  | -     | -                           | -                                     | -         | -     | -     |
| <i>Vna2.266</i>  | -     | -                           | -                                     | -         | -     | -     |
| <i>Vna2.269</i>  | -     | -                           | -                                     | -         | -     | -     |
| <i>Vna2.595</i>  | -     | -                           | -                                     | -         | -     | -     |
| <i>Vna2.747</i>  | -     | -                           | -                                     | -         | -     | -     |
| <i>Vna2.791</i>  | -     | -                           | -                                     | -         | -     | -     |
| <i>Vna2.831</i>  | -     | -                           | -                                     | -         | -     | -     |
| <i>Vna2.836</i>  | 1     | -                           | -                                     | -         | -     | -     |
| <i>Vna2.882</i>  | -     | -                           | -                                     | -         | -     | -     |
| <i>Vna2.912</i>  | -     | -                           | -                                     | -         | -     | -     |

|                  |       |                             |                             |           |       |         |
|------------------|-------|-----------------------------|-----------------------------|-----------|-------|---------|
| <i>Vna2.925</i>  | -     | -                           | -                           | -         | -     | -       |
| <i>Vna2.938</i>  | -     | -                           | -                           | -         | -     | -       |
| <i>Vna2.967</i>  | 1     | -                           | -                           | -         | -     | -       |
| <i>Vna2.979</i>  | -     | Effector (plant avirulence) | <i>Verticillium dahliae</i> | Vd4LysM   | 95.1  | 0.0E+00 |
| <i>Vna2.1044</i> | -     | -                           | -                           | -         | -     | -       |
| <i>Vna2.1057</i> | 1     | -                           | -                           | -         | -     | -       |
| <i>Vna2.1071</i> | 0.811 | -                           | -                           | -         | -     | -       |
| <i>Vna2.1099</i> | -     | -                           | -                           | -         | -     | -       |
| <i>Vna2.1121</i> | -     | -                           | -                           | -         | -     | -       |
| <i>Vna2.1134</i> | -     | -                           | -                           | -         | -     | -       |
| <i>Vna2.1139</i> | -     | -                           | -                           | -         | -     | -       |
| <i>Vna2.1140</i> | -     | -                           | -                           | -         | -     | -       |
| <i>Vna2.1145</i> | -     | -                           | -                           | -         | -     | -       |
| <i>Vna2.1151</i> | -     | -                           | -                           | -         | -     | -       |
| <i>Vna2.1158</i> | -     | -                           | -                           | -         | -     | -       |
| <i>Vna2.1160</i> | 0.772 | -                           | -                           | -         | -     | -       |
| <i>Vna3.5</i>    | -     | -                           | -                           | -         | -     | -       |
| <i>Vna3.9</i>    | -     | -                           | -                           | -         | -     | -       |
| <i>Vna3.33</i>   | -     | -                           | -                           | -         | -     | -       |
| <i>Vna3.35</i>   | -     | -                           | -                           | -         | -     | -       |
| <i>Vna3.54</i>   | -     | Effector (plant avirulence) | <i>Magnaporthe oryzae</i>   | AVR-Pita1 | 24.32 | 2E-10   |
| <i>Vna3.118</i>  | -     | -                           | -                           | -         | -     | -       |
| <i>Vna3.296</i>  | 0.88  | -                           | -                           | -         | -     | -       |
| <i>Vna3.320</i>  | 0.998 | Reduced virulence           | <i>Magnaporthe grisea</i>   | MHP1      | 44    | 2E-21   |
| <i>Vna3.350</i>  | -     | -                           | -                           | -         | -     | -       |
| <i>Vna3.353</i>  | 1     | -                           | -                           | -         | -     | -       |
| <i>Vna3.492</i>  | 0.994 | Unaffected pathogenicity    | <i>Claviceps purpurea</i>   | CPPH1     | 59.42 | 2E-19   |
| <i>Vna3.624</i>  | -     | -                           | -                           | -         | -     | -       |
| <i>Vna3.636</i>  | -     | -                           | -                           | -         | -     | -       |
| <i>Vna3.649</i>  | 0.711 | Unaffected pathogenicity    | <i>Botrytis elliptica</i>   | BeNEP1    | 56.79 | 2E-96   |
| <i>Vna3.706</i>  | -     | -                           | -                           | -         | -     | -       |

|                  |       |                          |                           |        |       |       |
|------------------|-------|--------------------------|---------------------------|--------|-------|-------|
| <i>Vna3.778</i>  | -     | -                        | -                         | -      | -     | -     |
| <i>Vna3.795</i>  | -     | -                        | -                         | -      | -     | -     |
| <i>Vna3.801</i>  | -     | -                        | -                         | -      | -     | -     |
| <i>Vna3.868</i>  | -     | -                        | -                         | -      | -     | -     |
| <i>Vna3.972</i>  | -     | -                        | -                         | -      | -     | -     |
| <i>Vna3.979</i>  | 0.94  | -                        | -                         | -      | -     | -     |
| <i>Vna3.988</i>  | 0.95  | -                        | -                         | -      | -     | -     |
| <i>Vna3.1010</i> | -     | -                        | -                         | -      | -     | -     |
| <i>Vna3.1041</i> | -     | -                        | -                         | -      | -     | -     |
| <i>Vna4.2</i>    | 0.987 | -                        | -                         | -      | -     | -     |
| <i>Vna4.10</i>   | -     | -                        | -                         | -      | -     | -     |
| <i>Vna4.61</i>   | -     | -                        | -                         | -      | -     | -     |
| <i>Vna4.63</i>   | -     | Unaffected pathogenicity | <i>Botrytis elliptica</i> | BeNEP2 | 29.15 | 3E-21 |
| <i>Vna4.88</i>   | 0.978 | -                        | -                         | -      | -     | -     |
| <i>Vna4.94</i>   | -     | -                        | -                         | -      | -     | -     |
| <i>Vna4.125</i>  | -     | -                        | -                         | -      | -     | -     |
| <i>Vna4.126</i>  | -     | -                        | -                         | -      | -     | -     |
| <i>Vna4.130</i>  | -     | Reduced virulence        | <i>Magnaporthe oryzae</i> | EMP1   | 42.01 | 2E-25 |
| <i>Vna4.135</i>  | 0.999 | -                        | -                         | -      | -     | -     |
| <i>Vna4.136</i>  | -     | -                        | -                         | -      | -     | -     |
| <i>Vna4.159</i>  | -     | -                        | -                         | -      | -     | -     |
| <i>Vna4.245</i>  | -     | -                        | -                         | -      | -     | -     |
| <i>Vna4.287</i>  | -     | -                        | -                         | -      | -     | -     |
| <i>Vna4.316</i>  | 1     | -                        | -                         | -      | -     | -     |
| <i>Vna4.363</i>  | -     | -                        | -                         | -      | -     | -     |
| <i>Vna4.382</i>  | -     | -                        | -                         | -      | -     | -     |
| <i>Vna4.406</i>  | -     | -                        | -                         | -      | -     | -     |
| <i>Vna4.410</i>  | -     | -                        | -                         | -      | -     | -     |
| <i>Vna4.420</i>  | -     | -                        | -                         | -      | -     | -     |
| <i>Vna4.443</i>  | -     | -                        | -                         | -      | -     | -     |
| <i>Vna4.515</i>  | -     | -                        | -                         | -      | -     | -     |

|                 |       |   |   |   |   |   |
|-----------------|-------|---|---|---|---|---|
| <i>Vna4.669</i> | 0.964 | - | - | - | - | - |
| <i>Vna4.673</i> | 0.992 | - | - | - | - | - |
| <i>Vna4.688</i> | -     | - | - | - | - | - |
| <i>Vna4.699</i> | -     | - | - | - | - | - |
| <i>Vna4.756</i> | 0.655 | - | - | - | - | - |
| <i>Vna4.761</i> | 0.999 | - | - | - | - | - |
| <i>Vna4.820</i> | -     | - | - | - | - | - |
| <i>Vna4.880</i> | -     | - | - | - | - | - |
| <i>Vna4.913</i> | -     | - | - | - | - | - |
| <i>Vna5.8</i>   | -     | - | - | - | - | - |
| <i>Vna5.18</i>  | -     | - | - | - | - | - |
| <i>Vna5.144</i> | -     | - | - | - | - | - |
| <i>Vna5.149</i> | -     | - | - | - | - | - |
| <i>Vna5.152</i> | -     | - | - | - | - | - |
| <i>Vna5.176</i> | -     | - | - | - | - | - |
| <i>Vna5.187</i> | -     | - | - | - | - | - |
| <i>Vna5.190</i> | -     | - | - | - | - | - |
| <i>Vna5.198</i> | -     | - | - | - | - | - |
| <i>Vna5.216</i> | 0.971 | - | - | - | - | - |
| <i>Vna5.217</i> | -     | - | - | - | - | - |
| <i>Vna5.235</i> | -     | - | - | - | - | - |
| <i>Vna5.290</i> | -     | - | - | - | - | - |
| <i>Vna5.362</i> | -     | - | - | - | - | - |
| <i>Vna5.475</i> | -     | - | - | - | - | - |
| <i>Vna5.479</i> | 0.993 | - | - | - | - | - |
| <i>Vna5.513</i> | -     | - | - | - | - | - |
| <i>Vna5.588</i> | -     | - | - | - | - | - |
| <i>Vna5.618</i> | -     | - | - | - | - | - |
| <i>Vna5.619</i> | 1     | - | - | - | - | - |
| <i>Vna5.682</i> | -     | - | - | - | - | - |
| <i>Vna5.694</i> | 0.952 | - | - | - | - | - |

|                 |       |                            |                                |      |       |       |
|-----------------|-------|----------------------------|--------------------------------|------|-------|-------|
| <i>Vna5.719</i> | -     | Reduced virulence          | <i>Candida albicans</i>        | RBT4 | 30.26 | 4E-14 |
| <i>Vna5.721</i> | 0.504 | -                          | -                              | -    | -     | -     |
| <i>Vna5.772</i> | -     | -                          | -                              | -    | -     | -     |
| <i>Vna5.785</i> | 0.743 | -                          | -                              | -    | -     | -     |
| <i>Vna5.793</i> | -     | -                          | -                              | -    | -     | -     |
| <i>Vna5.801</i> | -     | -                          | -                              | -    | -     | -     |
| <i>Vna5.873</i> | -     | -                          | -                              | -    | -     | -     |
| <i>Vna5.876</i> | 0.505 | -                          | -                              | -    | -     | -     |
| <i>Vna6.11</i>  | -     | -                          | -                              | -    | -     | -     |
| <i>Vna6.103</i> | -     | -                          | -                              | -    | -     | -     |
| <i>Vna6.108</i> | -     | -                          | -                              | -    | -     | -     |
| <i>Vna6.111</i> | -     | -                          | -                              | -    | -     | -     |
| <i>Vna6.119</i> | -     | -                          | -                              | -    | -     | -     |
| <i>Vna6.167</i> | -     | -                          | -                              | -    | -     | -     |
| <i>Vna6.168</i> | -     | -                          | -                              | -    | -     | -     |
| <i>Vna6.171</i> | -     | -                          | -                              | -    | -     | -     |
| <i>Vna6.223</i> | -     | -                          | -                              | -    | -     | -     |
| <i>Vna6.245</i> | -     | -                          | -                              | -    | -     | -     |
| <i>Vna6.283</i> | 0.819 | -                          | -                              | -    | -     | -     |
| <i>Vna6.401</i> | -     | -                          | -                              | -    | -     | -     |
| <i>Vna6.439</i> | 0.992 | -                          | -                              | -    | -     | -     |
| <i>Vna6.634</i> | -     | -                          | -                              | -    | -     | -     |
| <i>Vna7.77</i>  | 0.999 | Reduced virulence          | <i>Magnaporthe grisea</i>      | MHP1 | 66    | 6E-40 |
| <i>Vna7.87</i>  | 1     | Reduced virulence          | <i>Magnaporthe grisea</i>      | MHP1 | 49.3  | 2E-13 |
| <i>Vna7.176</i> | -     | -                          | -                              | -    | -     | -     |
| <i>Vna7.198</i> | -     | -                          | -                              | -    | -     | -     |
| <i>Vna7.214</i> | 0.866 | -                          | -                              | -    | -     | -     |
| <i>Vna7.239</i> | -     | Effector (plant avirulent) | <i>Phytophthora parasitica</i> | NPP1 | 33.58 | 2E-13 |
| <i>Vna7.252</i> | -     | -                          | -                              | -    | -     | -     |
| <i>Vna7.279</i> | 1     | -                          | -                              | -    | -     | -     |
| <i>Vna7.287</i> | -     | -                          | -                              | -    | -     | -     |

|          |       |                   |                           |      |       |        |
|----------|-------|-------------------|---------------------------|------|-------|--------|
| Vna7.365 | -     | -                 | -                         | -    | -     | -      |
| Vna7.429 | -     | -                 | -                         | -    | -     | -      |
| Vna7.443 | 0.986 | -                 | -                         | -    | -     | -      |
| Vna7.466 | -     | -                 | -                         | -    | -     | -      |
| Vna7.467 | -     | -                 | -                         | -    | -     | -      |
| Vna7.484 | -     | -                 | -                         | -    | -     | -      |
| Vna7.566 | -     | -                 | -                         | -    | -     | -      |
| Vna7.568 | 0.996 | -                 | -                         | -    | -     | -      |
| Vna7.569 | -     | -                 | -                         | -    | -     | -      |
| Vna7.570 | 0.786 | -                 | -                         | -    | -     | -      |
| Vna7.617 | -     | Reduced virulence | <i>Fusarium oxysporum</i> | Msb2 | 44.62 | 3E-103 |
| Vna7.767 | -     | -                 | -                         | -    | -     | -      |
| Vna7.850 | -     | -                 | -                         | -    | -     | -      |
| Vna8.38  | 0.78  | -                 | -                         | -    | -     | -      |
| Vna8.69  | -     | -                 | -                         | -    | -     | -      |
| Vna8.76  | -     | -                 | -                         | -    | -     | -      |
| Vna8.84  | -     | -                 | -                         | -    | -     | -      |
| Vna8.102 | -     | -                 | -                         | -    | -     | -      |
| Vna8.116 | -     | -                 | -                         | -    | -     | -      |
| Vna8.133 | 0.993 | -                 | -                         | -    | -     | -      |
| Vna8.145 | -     | -                 | -                         | -    | -     | -      |
| Vna8.175 | -     | -                 | -                         | -    | -     | -      |
| Vna8.188 | -     | -                 | -                         | -    | -     | -      |
| Vna8.213 | 0.996 | -                 | -                         | -    | -     | -      |
| Vna8.231 | -     | -                 | -                         | -    | -     | -      |
| Vna8.348 | -     | -                 | -                         | -    | -     | -      |
| Vna8.382 | 0.917 | -                 | -                         | -    | -     | -      |
| Vna8.395 | -     | -                 | -                         | -    | -     | -      |
| Vna8.440 | -     | -                 | -                         | -    | -     | -      |
| Vna8.524 | -     | -                 | -                         | -    | -     | -      |
| Vna8.621 | 0.957 | -                 | -                         | -    | -     | -      |

|          |       |                          |                           |        |       |             |
|----------|-------|--------------------------|---------------------------|--------|-------|-------------|
| Vna8.625 | -     | -                        | -                         | -      | -     | -           |
| Vna8.627 | -     | -                        | -                         | -      | -     | -           |
| Vna8.658 | -     | -                        | -                         | -      | -     | -           |
| Vna8.681 | 0.992 | -                        | -                         | -      | -     | -           |
| Vna8.686 | -     | -                        | -                         | -      | -     | -           |
| Vna8.691 | 1     | -                        | -                         | -      | -     | -           |
| Vna8.701 | -     | -                        | -                         | -      | -     | -           |
| Vna8.716 | 0.995 | -                        | -                         | -      | -     | -           |
| Vna8.724 | 0.573 | -                        | -                         | -      | -     | -           |
| Vna8.736 | 0.803 | -                        | -                         | -      | -     | -           |
| Vna8.781 | 0.768 | -                        | -                         | -      | -     | -           |
| Vna8.788 | -     | Unaffected pathogenicity | <i>Botrytis elliptica</i> | BeNEP2 | 24.9  | 0.000000002 |
| Vna8.805 | -     | -                        | -                         | -      | -     | -           |
| Vna8.820 | -     | -                        | -                         | -      | -     | -           |
| Vna9.33  | 0.977 | -                        | -                         | -      | -     | -           |
| Vna9.99  | -     | -                        | -                         | -      | -     | -           |
| Vna9.148 | -     | -                        | -                         | -      | -     | -           |
| Vna9.152 | 0.99  | -                        | -                         | -      | -     | -           |
| Vna9.214 | 0.989 | -                        | -                         | -      | -     | -           |
| Vna9.219 | -     | -                        | -                         | -      | -     | -           |
| Vna9.246 | -     | Reduced virulence        | <i>Candida albicans</i>   | RBT4   | 42.34 | 3E-28       |
| Vna9.268 | 0.975 | -                        | -                         | -      | -     | -           |
| Vna9.305 | 0.98  | -                        | -                         | -      | -     | -           |
| Vna9.306 | -     | -                        | -                         | -      | -     | -           |
| Vna9.392 | -     | -                        | -                         | -      | -     | -           |
| Vna9.489 | 1     | -                        | -                         | -      | -     | -           |
| Vna9.505 | -     | -                        | -                         | -      | -     | -           |
| Vna9.508 | -     | -                        | -                         | -      | -     | -           |
| Vna9.512 | -     | -                        | -                         | -      | -     | -           |
| Vna9.514 | -     | -                        | -                         | -      | -     | -           |
| Vna9.515 | -     | -                        | -                         | -      | -     | -           |



|                  |       |                   |                              |      |       |           |
|------------------|-------|-------------------|------------------------------|------|-------|-----------|
| <i>Vna9.556</i>  | -     | -                 | -                            | -    | -     | -         |
| <i>Vna10.75</i>  | -     | -                 | -                            | -    | -     | -         |
| <i>Vna10.76</i>  | 0.99  | -                 | -                            | -    | -     | -         |
| <i>Vna10.147</i> | 0.999 | Reduced virulence | <i>Verticillium dahliae</i>  | NLP1 | 81.13 | 2E-88     |
| <i>Vna10.151</i> | 0.992 | -                 | -                            | -    | -     | -         |
| <i>Vna10.240</i> | -     | -                 | -                            | -    | -     | -         |
| <i>Vna10.247</i> | -     | -                 | -                            | -    | -     | -         |
| <i>Vna10.263</i> | 0.689 | Reduced virulence | <i>Candida albicans</i>      | RBT4 | 43.54 | 1E-26     |
| <i>Vna10.309</i> | -     | -                 | -                            | -    | -     | -         |
| <i>Vna10.324</i> | -     | -                 | -                            | -    | -     | -         |
| <i>Vna10.326</i> | 0.86  | -                 | -                            | -    | -     | -         |
| <i>VnaUn.10</i>  | -     | -                 | -                            | -    | -     | -         |
| <i>VnaUn.103</i> | -     | -                 | -                            | -    | -     | -         |
| <i>VnaUn.206</i> | -     | -                 | -                            | -    | -     | -         |
| <i>VnaUn.216</i> | -     | -                 | -                            | -    | -     | -         |
| <i>VnaUn.279</i> | -     | Reduced virulence | <i>Aspergillus fumigatus</i> | LAEA | 44.19 | 0.0000001 |
| <i>VnaUn.337</i> | -     | -                 | -                            | -    | -     | -         |
| <i>VnaUn.480</i> | -     | -                 | -                            | -    | -     | -         |
